# Supplementary material
Source: PubMed Central journal article supplement (PMC4117266)
Supplement: Supp_Fig1.pdf [file Supp_Fig1.pdf]

## Supplementary Data

| <i>Species</i>             | 157  | 193  | 229      | 233 |
|----------------------------|------|------|----------|-----|
| human                      | HAAP | DFNA | TH-CAYDR |     |
| chimpanzee                 | HAAP | DFNA | TH-CAYDR |     |
| rhesus monkey              | HAAP | DFNA | TH-CAYDR |     |
| cow                        | HSAP | DFNA | TN-CAYDR |     |
| dog                        | HAAP | DFNA | TH-CAYDR |     |
| horse                      | HAAP | DFNA | TH-CAYDR |     |
| pig                        | HAAP | DFNA | HT-CAYDR |     |
| sheep                      | HSAP | DFNA | TN-CAYDR |     |
| rabbit                     | HSAP | DFNA | TN-CAYDR |     |
| mouse                      | HAAP | DFNA | TH-CAYDR |     |
| rat                        | HSAP | DFNA | TH-CAYDR |     |
| giant panda                | HAAP | DFNA | TH-CAYDR |     |
| opossum                    | HAAP | DFNA | TD-CAYDR |     |
| platypus                   | HAAP | DFNA | TY-CPYDR |     |
| chicken                    | HAEP | DFNA | TD-CAYDR |     |
| turkey                     | HAEP | DFNA | TD-CAYDR |     |
| zebra finch                | HSEP | DFNA | TD-CAYDR |     |
| Japanese ratsnake          | HAAP | DFNA | TI-CAYDR |     |
| Japanese mamushi           | HAAP | DFNA | TV-CAYDR |     |
| green anole                | HAAP | DFNA | SD-CAYDR |     |
| African clawed frog        | HTSP | DYNA | NTNCAYDR |     |
| bullfrog                   | HTSP | DYNA | NTNCPYDR |     |
| common toad                | HTSP | DYNA | NTHCPYDR |     |
| Japanese fire-bellied newt | HTSP | DYNA | NYHCAYDR |     |
| tilapia                    | HTSP | DFNA | TV-CPYDR |     |
| common carp                | HTSP | DFNA | TN-CPYDR |     |
| Japanese puffer fish       | HTSP | DFNA | TI-CPYDR |     |
| red seabream               | HTSP | DFNT | TTNCAYDR |     |
| zebrafish                  | HTSP | DFNA | TN-CPYDR |     |
| eel                        | HTSP | DFNA | TN-CPYDR |     |
| banded houndshark          | HTSP | DLNA | TTKCAYDR |     |
| Florida lancelet           | HTSP | DLNA | TN-CAYDR |     |
| sea squirt                 | HAKP | DFNA | TD-CAYDR |     |
| purple sea urchin          | HAKP | ---- | -----    |     |
| sea anemone                | HTKP | DFNA | GA-CAYDR |     |
| Trichoplax adhaerehs       | HASP | DFNA | TN-CAYDR |     |

**SUPPLEMENTARY FIG. S1.** Multiple alignment analysis on the amino-acid sequence of animal DNases I. Only the regions including the amino-acid residues corresponding to four functional SNPs, Ala157Val, Ala193Val, Thr229Met, and Tyr233Cys, are shown. SNPs, single-nucleotide polymorphisms.
